# Supplementary material for: Glycosyl benzoates as novel substrates for glycosynthases
Source: Royal Society of Chemistry journal article supplement (doi:10.1039/d3ob00979c), 2023-01-01
Supplement: d3ob00979c1.pdf [file d3ob00979c1.pdf]

## Supporting Information

### Glycosyl Benzoates as Efficient Substrates for Glycosynthases

*Sabrina de Lorenzo,<sup>1</sup> Lauriane Pillet,<sup>1</sup> David Lim,<sup>1</sup> and Francesca Paradisi<sup>1</sup>*

<sup>1</sup> Department of Chemistry, Biochemistry, and Pharmaceutical Sciences, Freiestrasse 3, 3012,  
Bern, Switzerland

## Table of Contents

|                                                                                                                                                                                                 |           |
|-------------------------------------------------------------------------------------------------------------------------------------------------------------------------------------------------|-----------|
| <b>Materials and Methods .....</b>                                                                                                                                                              | <b>3</b>  |
| <b>Expression and Purification of <i>HorGH1</i> wild-type and mutants .....</b>                                                                                                                 | <b>4</b>  |
| <b>Synthesis of Glycosyl Benzoates.....</b>                                                                                                                                                     | <b>4</b>  |
| <b>Table S1</b> Conversion of GlcNAc <b>2</b> to GlcNAc <b>3</b> benzoate under different co-solvents and co-solvent ratios.....                                                                | 4         |
| <b>Table S2</b> Conversion of Glc <b>4</b> to Glc benzoate <b>5</b> under different co-solvents and ratios.....                                                                                 | 5         |
| <b>Figure S1</b> Conversion of Glc <b>4</b> to GlcOBz <b>5</b> over time.....                                                                                                                   | 5         |
| <b>Table S3</b> Screening of Et <sub>3</sub> N, thiobenzoic acid, and DMC equivalents in the conversion of Glc <b>4</b> to GlcOBz <b>5</b> . ....                                               | 6         |
| <b>Table S4</b> Iterative addition of reagents for the conversion of Glc <b>4</b> to GlcOBz <b>5</b> .....                                                                                      | 6         |
| <b>Table S5</b> Selective benzylation of the anomeric hydroxyl group of mono-, di-, and trisaccharides. ....                                                                                    | 6         |
| <b>Screening of glycosyl esters as substrates for glycosyl hydrolases .....</b>                                                                                                                 | <b>7</b>  |
| <b>Figure S2</b> Use of $\beta$ -glucosyl benzoate <b>5</b> as a substrate for the hydrolytic reaction by $\beta$ -glucosidases.....                                                            | 7         |
| <b>Figure S3</b> Formation of pNT-Glc <b>11</b> using HorGH1 E166A or E166A/M299R and using either $\beta$ -glucosyl benzoate <b>5</b> or $\beta$ -pNP-Glc <b>12</b> as the glycosyl donor..... | 7         |
| <b>Screening of thiols accepted by <i>HorGH1</i> E166A mutant .....</b>                                                                                                                         | <b>8</b>  |
| <b>Figure S4</b> Conversion of $\beta$ -Bz-Glc <b>5</b> to thioglycoside products by HorGH1 E166A.. ....                                                                                        | 8         |
| <b>Figure S5</b> Use of <i>p</i> -nitrophenol as the glycosyl acceptor in HorGH1 E166A catalysed glycosylation of $\beta$ -Bz-Glc <b>5</b> . ....                                               | 9         |
| <b>Experimental .....</b>                                                                                                                                                                       | <b>10</b> |
| 2-Chloro-1,3-dimethylimidazolinium chloride <b>1</b> <sup>5</sup> .....                                                                                                                         | 10        |
| Benzoyl 2-Acetamido-2-deoxy-D-glucopyranoside <b>3</b> .....                                                                                                                                    | 10        |
| Benzoyl $\beta$ -D-glucopyranoside <b>5</b> .....                                                                                                                                               | 11        |
| Benzoyl $\alpha$ -D-mannopyranoside <b>7</b> .....                                                                                                                                              | 11        |
| Benzoyl $\beta$ -D-lactoside <b>8</b> .....                                                                                                                                                     | 12        |
| Benzoyl $\beta$ -D-maltoside <b>9</b> .....                                                                                                                                                     | 13        |
| Benzoyl $\beta$ -D-maltotrioxide <b>10</b> .....                                                                                                                                                | 13        |
| <b>Spectral Data .....</b>                                                                                                                                                                      | <b>15</b> |
| Benzoyl 2-Acetamido-2-deoxy-D-glucopyranoside <b>3</b> .....                                                                                                                                    | 15        |
| Benzoyl $\beta$ -D-glucopyranoside <b>5</b> .....                                                                                                                                               | 16        |

|                                                    |           |
|----------------------------------------------------|-----------|
| Benzoyl $\alpha$ -D-mannopyranoside <b>7</b> ..... | 17        |
| Benzoyl $\beta$ -D-lactoside <b>8</b> .....        | 18        |
| Benzoyl $\beta$ -D-maltoside <b>9</b> .....        | 19        |
| Benzoyl $\beta$ -D-maltotrioside <b>10</b> .....   | 20        |
| <b>References</b> .....                            | <b>21</b> |

## Materials and Methods

All commercially available chemicals were used without any further purification. Double-distilled water was retrieved from a Milli-Q® IQ 7000 Ultrapure Water System. To measure the pH of solutions, an LLG-pH Meter 7 was used. RP-HPLC analyses were conducted with an HPLC Dionex UltiMate 3000 (Thermo Fisher, Loughborough, UK) equipped with a C18 column 3.5  $\mu$ m, 2.1  $\times$  100 mm (Waters, Elstree, UK). All chemical reagents were acquired from Sigma Aldrich (Merck KGaA, Darmstadt) unless otherwise specified. 4-Nitrophenyl- $\beta$ -D-glucopyranoside (*p*NP-Glc) used for activity assays was purchased from Carbosynth. All commercial chemicals were used without further purification. Standards of *p*-Nitrophenyl- $\beta$ -D-thioglucopyranoside(*p*NP-Glc), *p*-toluyl- $\beta$ -D-glucopyranoside and *p*-bromophenyl- $\beta$ -D-thioglucopyranoside were synthesised according to literature procedures.<sup>1</sup> Reactions conducted at 0 °C were cooled by means of an ice bath. Reactions at -20 °C were achieved by mixing NaCl and ice (*w/w*, 1:3). Dry solvents were obtained by filtration over columns of dried alumina under argon (SPS). Solvent was removed under reduced pressure using a Buchi™ rotary evaporator. Thin Layer Chromatography (t.l.c.) was carried out on Merck Silica Gel 60F254 aluminium-backed plates. Visualisation of the plates was achieved using a UV lamp ( $\lambda_{\text{max}}$  = 254 or 365 nm), and/or ammonium molybdate (5% in 2 M H<sub>2</sub>SO<sub>4</sub>), and/or aniline-diphenylamine-85 % phosphoric acid (4 mL : 4 g : 20 mL) in acetone (96 mL) and/or ninhydrin. Flash column chromatography was carried out using Silicycle SiliaFlash® P60 silica (230-400 mesh). Proton and carbon nuclear magnetic resonance ( $\delta_{\text{H}}$ ,  $\delta_{\text{C}}$ ) spectra were recorded on a Bruker Ascend™ 300 (300 MHz) spectrometer. All chemical shifts are quoted on the  $\delta$ -scale in ppm using the residual solvent as an internal standard. <sup>1</sup>H and <sup>13</sup>C spectra were assigned using COSY, DEPT, HSQC, and HMBC. For mannopyranosides, a coupled HSQC spectrum was obtained in order to determine the anomeric configuration based on the <sup>1</sup>J<sub>C-H</sub> value (value of a  $\beta$ -anomer is ~ 160 Hz;  $\alpha$ -anomer is ~ 170 Hz).<sup>2</sup> High resolution mass spectra were

recorded a Bruker FT-ICR mass spectrometer using electrospray ionisation (ESI).  $M/z$  values are reported in Daltons.

### Expression and Purification of *HorGH1* wild-type and mutants

DNA preparation and site-directed mutagenesis of the *Halothermothrix orenii* (*HorGH1*, EC 3.2.1.21) mutants (E166A, E166A/M299R, E166A/E354G, E166A/E354G/M99R) was previously performed by Pillet *et al.*<sup>1</sup> and the same plasmids were used in this study. The wild type and mutant *HorGH1* variants expression, purification and quantification was performed according to Pillet *et al.*<sup>1</sup> Briefly, the plasmids harbouring the genes of the different variants were transformed into chemically competent *E.coli* BL21(DE3) and expression was carried out in 300 mL autoinduction media with 100 µg/mL ampicillin at 37 °C and 150 rpm for 24 hours. Cells were then centrifuged at 2500·g, 4 °C, 20 min, sonicated at 40 % amplitude for 8 min, with pulses of 5 s ON, 10 s OFF and purified by metal affinity chromatography (IMAC) using an AKTA™ Start. Purification of the enzyme was checked by analysing the different fractions with a 12 % SDS PAGE and the concentration of the purified enzymes was estimated by measuring the absorbance at 280 nm in the EPOCH2 (nanodrop Take3 plate) using an extinction coefficient ( $\epsilon$ ) of 106,230 L·mol<sup>-1</sup>·cm<sup>-1</sup> (predicted using the ExPASy ProtParam tool<sup>3-4</sup>) and a molecular weight of 52,003.56 Da.<sup>3-4</sup>

### Synthesis of Glycosyl Benzoates

**Table S1** Conversion of GlcNAc **2** to GlcNAc **3** benzoate under different co-solvents and co-solvent ratios.

| Entry | Co-solvent | D <sub>2</sub> O/Co-solvent | Conversion [%] | $\alpha/\beta$ |
|-------|------------|-----------------------------|----------------|----------------|
| 1     | MeCN       | 5 : 1                       | 22             | 1 : 4          |
| 2     | MeCN       | 2 : 1                       | 20             | 3 : 2          |
| 3     | MeCN       | 1 : 1                       | -              | -              |
| 4     | Dioxane    | 5 : 1                       | 16             | 3 : 2          |
| 5     | Dioxane    | 2 : 1                       | 16             | 3 : 2          |
| 6     | Dioxane    | 1 : 1                       | 1              | <i>n.q.</i>    |
| 7     | THF        | 5 : 1                       | 7              | 3 : 2          |
| 8     | THF        | 2 : 1                       | 7              | 3 : 1          |

|   |     |       |   |       |
|---|-----|-------|---|-------|
| 9 | THF | 1 : 1 | 7 | 3 : 1 |
|---|-----|-------|---|-------|

Conversions were determined by  $^1\text{H}$  NMR integration of the anomeric protons. n.q. not quantified.

**Table S2** Conversion of Glc **4** to Glc benzoate **5** under different co-solvents and ratios.

| Entry | Co-solvent | D <sub>2</sub> O/Co-solvent | Conversion [%] | $\alpha/\beta$ |
|-------|------------|-----------------------------|----------------|----------------|
| 1     | MeCN       | 5 : 1                       | 17             | 0 : 1          |
| 2     | MeCN       | 2 : 1                       | 17             | 0 : 1          |
| 3     | MeCN       | 1 : 1                       | 15             | 0 : 1          |
| 4     | MeCN       | 1:2                         | -              | -              |
| 5     | Dioxane    | 5 : 1                       | 12             | 0 : 1          |
| 6     | Dioxane    | 2 : 1                       | 12             | 0 : 1          |
| 7     | Dioxane    | 1 : 1                       | 12             | 0 : 1          |
| 8     | THF        | 5 : 1                       | 10             | 0 : 1          |
| 9     | THF        | 2 : 1                       | 10             | 0 : 1          |
| 10    | THF        | 1 : 1                       | 10             | 0 : 1          |

Conversions were determined by  $^1\text{H}$  NMR integration of the anomeric protons. n.q. not quantified.

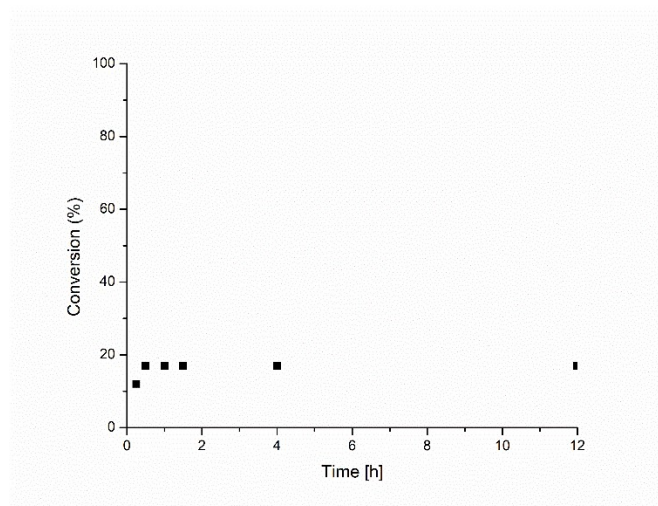

**Figure S1** Conversion of Glc **4** to GlcOBz **5** over time.

**Table S3** Screening of Et<sub>3</sub>N, thiobenzoic acid, and DMC equivalents in the conversion of Glc **4** to GlcOBz **5**.

| Entry | Et <sub>3</sub> N (equiv.) | Thiobenzoic acid (equiv) | DMC 1 (equiv.) | Conversion [%] | $\alpha/\beta$ |
|-------|----------------------------|--------------------------|----------------|----------------|----------------|
| 1     | 20                         | 5                        | 3              | -              | -              |
| 2     | 10                         | 10                       | 3              | 8              | 0 : 1          |
| 3     | 10                         | 5                        | 6              | 20             | 0 : 1          |
| 4     | 10                         | 5                        | 9              | 10             | 0 : 1          |
| 5     | 2.1                        | 1                        | 3              | 8              | 0 : 1          |
| 6     | 5                          | 5                        | 6              | 12             | 0 : 1          |

**Table S4** Iterative addition of reagents for the conversion of Glc **4** to GlcOBz **5**.

| Entry | Et <sub>3</sub> N (equiv.) | Thiobenzoic acid (equiv) | DMC 1 (equiv.) | Conversion [%] | $\alpha/\beta$ |
|-------|----------------------------|--------------------------|----------------|----------------|----------------|
| 1     | 10                         | 5                        | 2              | 15             | 0 : 1          |
| 2     | 10                         | 5                        | 3              | 17             | 0 : 1          |

**Table S5** Selective benzylation of the anomeric hydroxyl group of mono-, di-, and trisaccharides.

| Entry     | Sugar       | Product                                                                             | Yield [%] | $\alpha/\beta$ |
|-----------|-------------|-------------------------------------------------------------------------------------|-----------|----------------|
| 1         | galactose   | 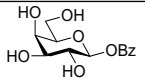 | n.d.      | -              |
| 2         | Mannose     |  | 4         | $\alpha$ only  |
| 3         | lactose     |  | 11        | $\beta$ only   |
| 4         | maltose     |  | 5         | $\beta$ only   |
| 5         | maltotriose |  | 3         | $\beta$ only   |
| <b>10</b> |             |                                                                                     |           |                |

<sup>a</sup> Reagents and conditions: Sugar, thiobenzoic acid (5 equiv.), Et<sub>3</sub>N (10 equiv.), H<sub>2</sub>O/MeCN (5:1), 0 °C, then DMC (10 equiv.) 30 mins.

### Screening of glycosyl esters as substrates for glycosyl hydrolases

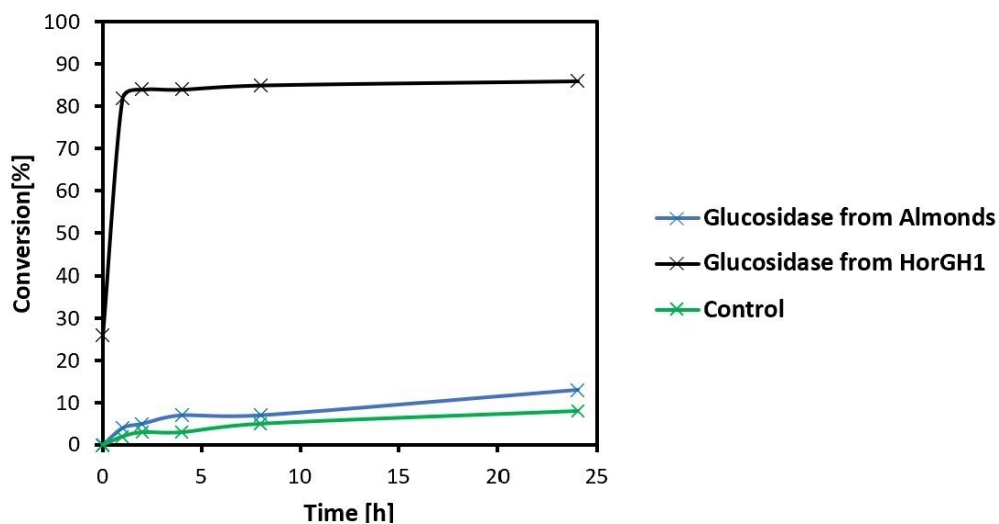

**Figure S2** Use of  $\beta$ -glucosyl benzoate **5** as a substrate for the hydrolytic reaction by  $\beta$ -glucosidases.

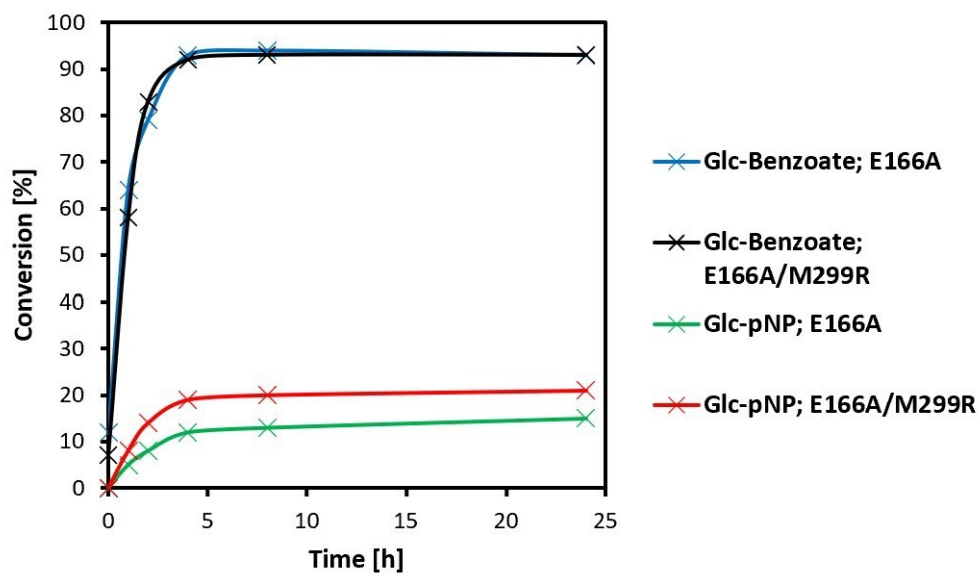

**Figure S3** Formation of pNT-Glc **11** using HorGH1 E166A or E166A/M299R and using either  $\beta$ -glucosyl benzoate **5** or  $\beta$ -pNP-Glc **12** as the glycosyl donor.

### Screening of thiols accepted by *HorGH1* E166A mutant

Reactions were performed with  $\beta$ -D-glucopyranosyl benzoate **5** as the sugar donor and the corresponding thiols **13a-i** as the acceptor. Reactions were performed at 25 °C in 50 mM HEPES buffer pH 7.4 containing 30 % DMSO, 0.3 mg/mL enzyme, 1 mM sugar donor, 20 mM  $\beta$ -mercaptoethanol and 10 mM of thiol in a total reaction volume of 1 mL.

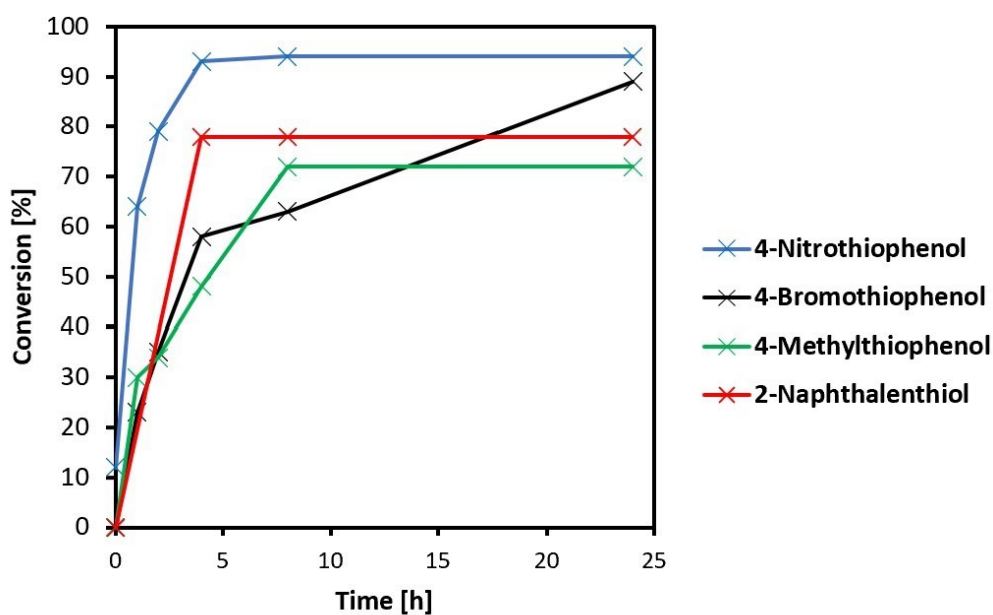

**Figure S4** Conversion of  $\beta$ -Bz-Glc **5** to thioglycoside products by *HorGH1* E166A.

Reactions were performed at 25 °C in 50 mM HEPES buffer pH 7.4 containing 30 % DMSO, 0.3 mg/mL enzyme, 1 mM sugar donor, 20 mM  $\beta$ -mercaptoethanol and 10 mM of thiol in a total reaction volume of 1 mL.

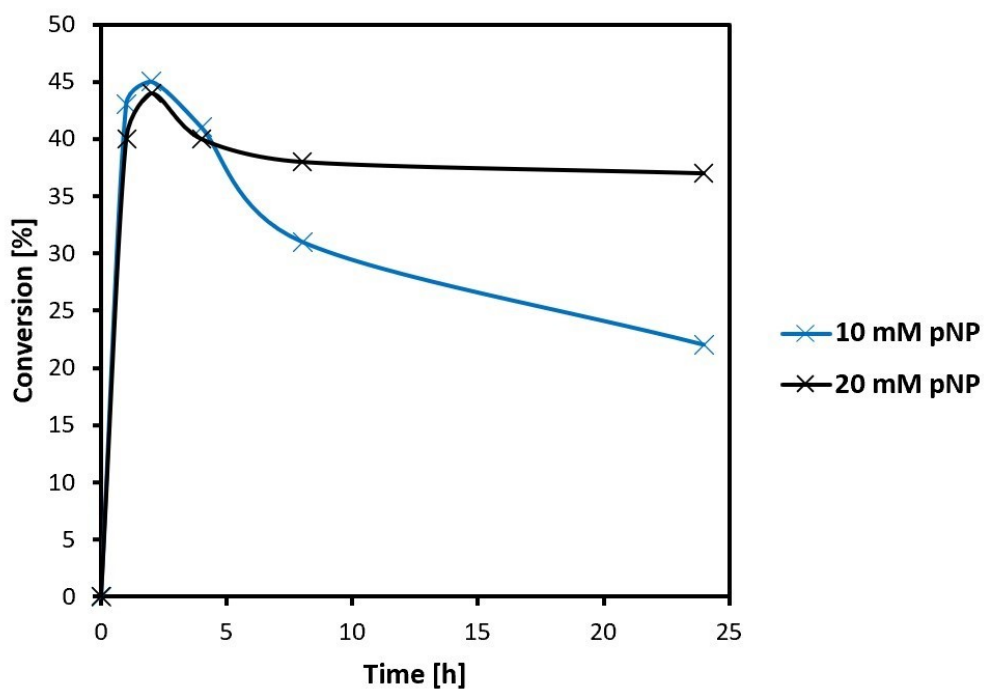

**Figure S5** Use of *p*-nitrophenol as the glycosyl acceptor in HorGH1 E166A catalysed glycosylation of  $\beta$ -Bz-Glc **5**.

#### Confirmation of $\beta$ -thioglycosides synthesis by $^1\text{H}$ NMR

The stereochemistry of the thioglycosides were confirmed by  $^1\text{H}$  NMR by comparing the authentic standard (Figure S6A)<sup>1</sup> to the enzymatic reaction performed by *HorGH1* E166A variant as described in the “Screening of thiols accepted by the *HorGH1* E166A mutant” section (Figure S6C). A control was run in parallel with all components except the enzyme (Figure S6B).

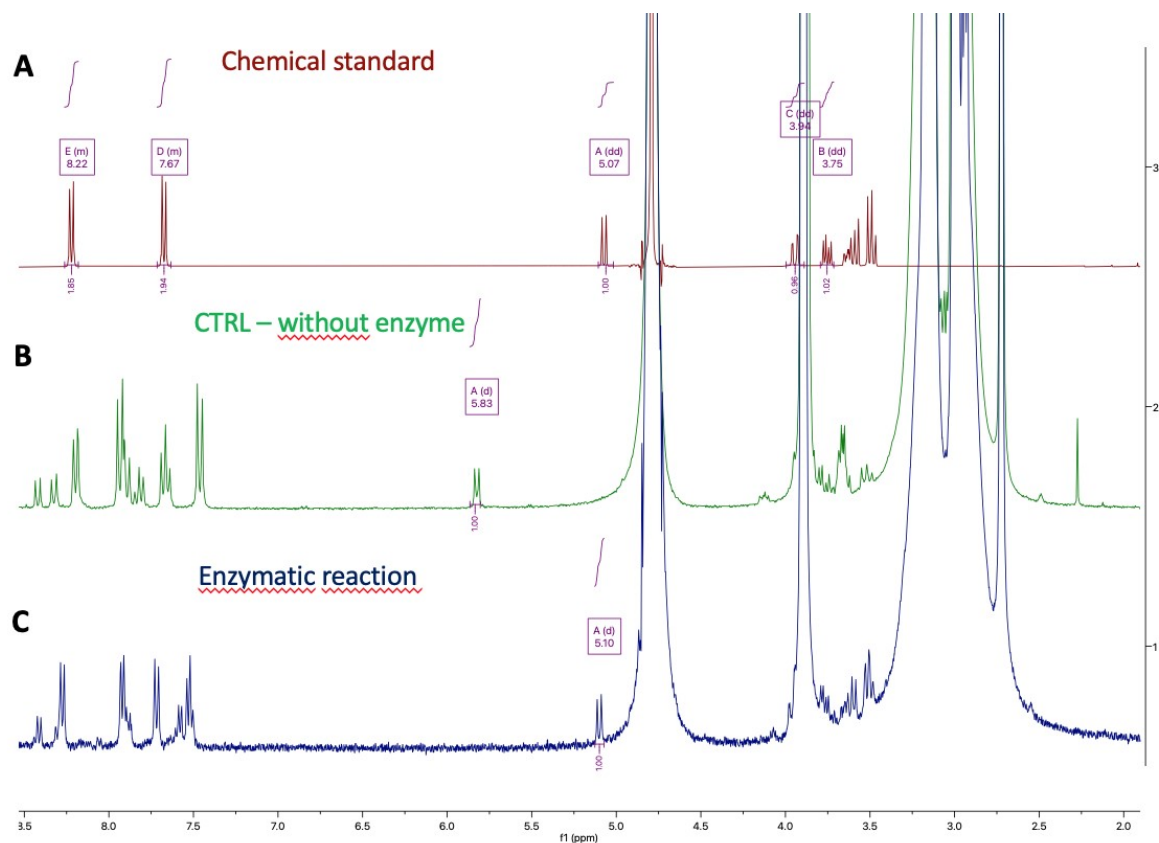

**Figure S6:** Overlaid <sup>1</sup>H NMR spectra of authentic *p*-nitrophenyl-β-D-thioglucopyranoside (*p*NT-Glc) (A), the biocatalytic reaction mixture using the *HorGH1* E166A mutant (C), and the control reaction without enzyme (B). Chemical shifts for the anomeric and aromatic protons of the product are provided: δ<sub>H</sub> (300 MHz, D<sub>2</sub>O) 5.10 (1H, d, *J*<sub>1,2</sub> 9.6 Hz, H-1), 7.71 (1H, d, *J* 9.0 Hz, Ar-H), 8.22 (1H, d, *J* 9.0 Hz, Ar-H).

## Experimental

### 2-Chloro-1,3-dimethylimidazolinium chloride **1**<sup>5</sup>

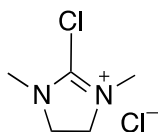

1,3-Dimethylimidazolidinone (19.0 mL, 176 mmol) was dissolved in toluene (200 mL) and stirred under an N<sub>2</sub> atmosphere. Oxalyl chloride (20 mL, 233 mmol) was added dropwise and the reaction was stirred at 50 °C. After 7 h, the flask was allowed to cool to rt and stirred overnight. After 15 h, the precipitate was filtered, washed with cold toluene and recrystallized (acetonitrile/diethyl ether). The white solid was filtered and dried under vacuum to yield 2-chloro-1,3-dimethylimidazolinium chloride **1** (18.1 g, 61 %) as a white powdery solid;  $\delta_{\text{H}}$  (300 MHz, CD<sub>3</sub>CN)<sup>5</sup> 3.14 (6H, s, 2 x CH<sub>3</sub>), 3.96 (4H, s, 2 x CH<sub>2</sub>); HRMS (ESI) Calcd. For C<sub>5</sub>H<sub>10</sub>ClN<sub>2</sub> (M<sup>+</sup>) 133.0527. Found 133.0529.

### Benzoyl 2-Acetamido-2-deoxy-D-glucopyranoside **3**

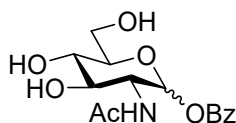

*N*-Acetyl-D-glucosamine **2** (120 mg, 0.55 mmol), thiobenzoic acid (320  $\mu$ L, 2.75 mmol) and triethylamine (770  $\mu$ L, 1.70 mmol) were stirred in H<sub>2</sub>O/MeCN (5:1, 2 mL), and the mixture was cooled to 0 °C. DMC **1** (290 mg, 1.70 mmol) was then added portionwise and the mixture then allowed to stir for 30 mins. The reaction mixture was then diluted with H<sub>2</sub>O (5 mL), washed with DCM (5 x 10 mL), and lyophilised. Purification of the residue by flash column chromatography gave benzoyl 2-acetamido-2-deoxy-D-glucopyranoside **3** (17.6 mg, 10 %) as a white solid ( $\alpha/\beta$ , 4:1); R<sub>f</sub> ( $\alpha$  anomer): 0.5 (15:85 MeOH:DCM), R<sub>f</sub> ( $\beta$  anomer): 0.4 (15:85 DCM:MeOH);  $\delta_{\text{H}}$  (400 MHz, CD<sub>3</sub>CN)  $\alpha$ -anomer: 1.96 (3H, s, NHCOCH<sub>3</sub>), 3.61-3.68 (1H, m, H-5), 3.76-3.86 (3H, m, H-4, H-6, H-6'), 4.00 (1H, dd,  $J_{2,3}$  10.8 Hz,  $J_{3,4}$  8.9 Hz, H-3), 4.12 (1H, dd,  $J_{1,2}$  3.5 Hz, H-2), 6.33 (1H, d, H-1), 7.59 (1H, d,  $J$  7.2 Hz, Ar-H), 7.75 (1H, t,  $J$  8.2 Hz, Ar-H), 8.14 (2H, d,  $J$  7.4 Hz, Ar-H);  $\delta_{\text{C}}$  (100 MHz, CD<sub>3</sub>CN) 21.1 (q, NHCOCH<sub>3</sub>), 52.3 (d, C-2), 59.6 (t, C-6), 68.7 (d, C-5), 69.9 (d, C-3), 73.8 (d, C-4), 90.9 (d, C-1), 127.7, 128.3, 129.3, 133.8 (Ar-C), 165.7 (s, NHCOCH<sub>3</sub>), 173.4 (s, COC<sub>6</sub>H<sub>5</sub>);  $\delta_{\text{H}}$  (400 MHz, CD<sub>3</sub>CN)  $\beta$ -anomer:

1.94 (1H, s, NHCOCH<sub>3</sub>), 3.54 (1H, at, *J* 9.8 Hz, H-5), 3.68-3.75 (1H, m, H-6), 3.76-3.86 (2H, m, H-4, H-6'), 3.90 (1H, dd, *J*<sub>2,3</sub> 10.5 Hz, *J*<sub>3,4</sub> 8.9 Hz, H-3), 4.06 (1H, dd, *J*<sub>1,2</sub> 8.7 Hz, H-2), 5.78 (1H, d, H-1), 7.59 (2H, d, *J* 7.2 Hz, Ar-H), 7.75 (1H, d, *J* 8.2 Hz, Ar-H), 8.06 (1H, d, *J* 8.1 Hz, Ar-H); δ<sub>C</sub> (100 MHz, CD<sub>3</sub>CN) 21.5 (q, NHCOCH<sub>3</sub>), 53.8 (d, C-2), 60.0 (t, C-6), 69.0 (d, C-5), 72.7 (d, C-3), 76.3 (d, C-4), 93.0 (d, C-1), 128.1, 128.4, 129.3, 133.9 (Ar-C), 165.7 (s, NHCOCH<sub>3</sub>), 173.3 (s, COC<sub>6</sub>H<sub>5</sub>); HRMS (ESI) Cald. for C<sub>15</sub>H<sub>20</sub>NO<sub>7</sub><sup>+</sup> (M + H<sup>+</sup>) 326.1234. Found 326.1238.

#### Benzoyl β-D-glucopyranoside **5**

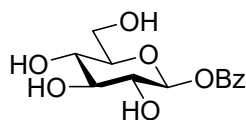

D-Glucose monohydrate **4** (2.00 g, 10.1 mmol), thiobenzoic acid (6.0 mL, 50.9 mmol) and triethylamine (14 mL, 100 mmol) were stirred in H<sub>2</sub>O/MeCN (5:1, 36 mL), and the mixture was cooled to 0 °C. DMC **1** (5.21 g, 30.7 mmol) was then added portionwise and the mixture then allowed to stir for 30 mins. The reaction mixture was then washed with DCM (5 x 50 mL), and the aqueous phase was filtered through a 0.45 μm PTFE filter. Purification of the filtrate by semi-preparative RP-HPLC (column: Agilent 5 Prep-C18 (100 Å); eluent: A (water + 0.1 % trifluoroacetic acid) and B (MeCN + 0.1 % trifluoroacetic acid); sample was run at 25 mL/min with a gradient of: 0-30 min: 100% A, 30-40 min 100% B, 40-60 min: 100 % A, 60-70 min: 100% A; detection: 235 nm) afforded benzoyl β-D-glucopyranoside **5** (258 mg, 9 %) as a white solid, R<sub>f</sub> 0.4 (15:85 MeOH:DCM); t<sub>R</sub> = 4.68 mins; δ<sub>H</sub> (400 MHz, D<sub>2</sub>O)<sup>6</sup> 3.45 (1H, m, H-4), 3.56-3.64 (3H, m, H-2, H-3, H-5), 3.68 (1H, dd, *J*<sub>6,6'</sub> 12.4 Hz, *J*<sub>5,6</sub> 5.5 Hz, H-6), 3.84 (1H, dd, *J*<sub>5,6'</sub> 2.2 Hz, H-6'), 5.75 (1H, d, *J*<sub>1,2</sub> 7.5 Hz, H-1), 7.50 (1H, at, *J* 7.8 Hz, Ar-H), 7.66 (1H, d, *J* 7.7 Hz, Ar-H), 8.05 (1H, d, *J* 7.7 Hz, Ar-H); HRMS (ESI) Cald. for C<sub>13</sub>H<sub>16</sub>O<sub>7</sub>Na<sup>+</sup> (M + Na<sup>+</sup>) 307.0788. Found 307.0797.

#### Benzoyl α-D-mannopyranoside **7**

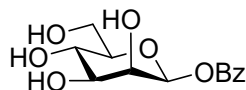

D-Mannose (200 mg, 1.12 mmol), thiobenzoic acid (670 μL, 5.60 mmol) and triethylamine (1.6 mL, 11.4 mmol) were stirred in H<sub>2</sub>O/MeCN (5:1, 4 mL), and the mixture was cooled to 0

°C. DMC **1** (584 g, 3.40 mmol) was then added portionwise and the mixture then allowed to stir for 30 mins. The reaction mixture was then diluted with H<sub>2</sub>O (20 mL), washed with DCM (5 x 25 mL), and the aqueous phase was filtered through a 0.45 µm PTFE filter. Purification of the filtrate by semi-preparative RP-HPLC (column: Agilent 5 Prep-C18 (100 Å); eluent: A (water + 0.1 % trifluoroacetic acid) and B (MeCN + 0.1 % trifluoroacetic acid); sample was run at 25 mL/min with a gradient of: 0-30 min: 100% A, 30-40 min 100% B, 40-60 min: 100 % A, 60-70 min: 100% A; detection: 235 nm) afforded benzoyl β-D-mannopyranoside **7** (13.8 mg, 4 %) as a white solid, *R*<sub>f</sub> 0.4 (15:85 MeOH:DCM); *t*<sub>R</sub> = 4.67 mins; δ<sub>H</sub> (400 MHz, D<sub>2</sub>O)<sup>6</sup> 3.78-3.89 (4H, m, H-2, H-3, H-6, H-6'), 4.10 (1H, m, H-4), 4.18 (1H, m, H-5), 6.27 (1H, d, *J*<sub>1,2</sub> 1.9 Hz, H-1), 7.58 (2H, at, *J* 7.8 Hz, Ar-H), 7.76 (1H, at, *J* 7.5 Hz, Ar-H), 8.11 (2H, d, *J* 7.7 Hz, Ar-H); HRMS (ESI) Cald. for C<sub>13</sub>H<sub>15</sub>O<sub>7</sub><sup>-</sup> (M - z H<sup>+</sup>) 283.0823. Found 283.0817.

#### Benzoyl β-D-lactoside **8**

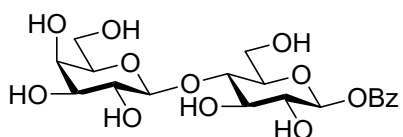

α-Lactose monohydrate (402 mg, 1.11 mmol), thiobenzoic acid (670 µL, 5.60 mmol) and triethylamine (1.60 mL, 11.4 mmol) were stirred in H<sub>2</sub>O/MeCN (5:1, 4 mL), and the mixture was cooled to 0 °C. DMC **1** (580 g, 3.40 mmol) was then added portionwise and the mixture then allowed to stir for 30 mins. The reaction mixture was then diluted with H<sub>2</sub>O (20 mL), washed with DCM (5 x 25 mL), and the aqueous phase was filtered through a 0.45 µm PTFE filter. Purification of the filtrate by semi-preparative RP-HPLC (column: Agilent 5 Prep-C18 (100 Å); eluent: A (water + 0.1 % trifluoroacetic acid) and B (MeCN + 0.1 % trifluoroacetic acid); sample was run at 25 mL/min with a gradient of: 0-30 min: 100% A, 30-40 min 100% B, 40-60 min: 100 % A, 60-70 min: 100% A; detection: 235 nm) afforded benzoyl β-D-lactoside **8** (54.2 mg, 11 %) as a white solid, *R*<sub>f</sub> 0.2 (1:4 MeOH:DCM); *t*<sub>R</sub> = 4.82 mins; δ<sub>H</sub> (400 MHz, D<sub>2</sub>O)<sup>6</sup> 3.66 (1H, dd, *J*<sub>2b,3b</sub> 9.9 Hz, *J*<sub>1b,2b</sub> 7.7 Hz, H-2b) 3.76 (1H, dd, *J*<sub>3b,4b</sub> 3.4 Hz, H-3b), 3.81-3.95 (8H, m, H-2a, H-3a, H-4a, H-5a, H-6a, H-6a', H-6b, H-6b'), 4.02 (1H, m, H-5b), 4.06 (1H, m, H-4b), 4.57 (1H, d, *J*<sub>1b,2b</sub> 7.7 Hz, H-1b), 5.93 (1H, d, *J*<sub>1a,2a</sub> 7.9 Hz, H-1a), 7.66 (2H, at, *J* 7.7 Hz, Ar-H), 7.83 (1H, t, *J* 7.5 Hz, Ar-H), 8.22 (1H, d, *J* 7.7 Hz, Ar-H); HRMS (ESI) Cald. for C<sub>19</sub>H<sub>27</sub>O<sub>12</sub><sup>+</sup> (M + H<sup>+</sup>) 447.1497. Found 447.1483.

### Benzoyl $\beta$ -D-maltoside **9**

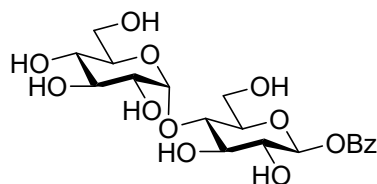

D-Maltose monohydrate (402 mg, 1.11 mmol), thiobenzoic acid (670  $\mu$ L, 5.60 mmol) and triethylamine (1.6 mL, 11.4 mmol) were stirred in  $\text{H}_2\text{O}/\text{MeCN}$  (5:1, 4 mL), and the mixture was cooled to 0  $^\circ\text{C}$ . DMC **1** (580 g, 3.40 mmol) was then added portionwise and the mixture then allowed to stir for 30 mins. The reaction mixture was then diluted with  $\text{H}_2\text{O}$  (20 mL), washed with DCM (5 x 25 mL), and the aqueous phase was filtered through a 0.45  $\mu\text{m}$  PTFE filter. Purification of the filtrate by semi-preparative RP-HPLC (column: Agilent 5 Prep-C18 (100  $\text{\AA}$ ); eluent: A (water + 0.1 % trifluoroacetic acid) and B (MeCN + 0.1 % trifluoroacetic acid); sample was run at 25 mL/min with a gradient of: 0-30 min: 100% A, 30-40 min 100% B, 40-60 min: 100 % A, 60-70 min: 100% A; detection: 235 nm) afforded benzoyl  $\beta$ -D-maltoside **9** (22.9 mg, 5 %) as a white solid,  $R_f$  0.2 (1:4 MeOH:DCM);  $t_R$  = 4.82 mins;  $\delta_H$  (400 MHz,  $\text{D}_2\text{O}$ )<sup>6</sup> 3.44 (1H, at,  $J$  9.5 Hz, H-4), 3.61 (1H, dd,  $J_{4a,5a}$  10.5 Hz,  $J_{5a,6a}$  4.9 Hz, H-5a), 3.71-3.86 (8H, m, H-2a, H-3a, H-2b, H-3b, H-4b, H-5b, H-6b, H-6b'), 3.92-3.97 (2H, m, H-6a, H-6a'), 5.46 (1H, d,  $J_{1b,2b}$  3.9 Hz, H-1b), 5.84 (1H, d,  $J_{1a,2a}$  8.2 Hz, H-1a), 7.58 (2H, d,  $J$  7.5 Hz, Ar-H), 7.74 (1H, at,  $J$  7.5 Hz, Ar-H), 8.14 (2H, d,  $J$  7.8 Hz, Ar-H); HRMS (ESI) Cald. for  $\text{C}_{19}\text{H}_{25}\text{O}_{12}^{-\text{H}^+}$  445.1351. Found 447.1339.

### Benzoyl $\beta$ -D-maltotrioside **10**

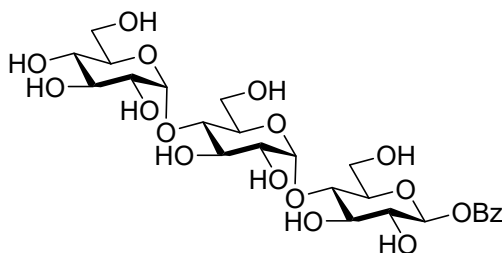

Maltotriose (600 mg, 1.20 mmol), thiobenzoic acid (700  $\mu$ L, 5.90 mmol) and triethylamine (1.7 mL, 12.2 mmol) were stirred in  $\text{H}_2\text{O}/\text{MeCN}$  (5:1, 4 mL), and the mixture was cooled to 0  $^\circ\text{C}$ . DMC **1** (590 mg, 3.60 mmol) was then added portionwise and the mixture then allowed to stir for 30 mins. The reaction mixture was then diluted with  $\text{H}_2\text{O}$  (20 mL), washed with DCM

(5 x 25 mL), and the aqueous phase was filtered through a 0.45  $\mu$ m PTFE filter. Purification of the filtrate by semi-preparative RP-HPLC (column: Agilent 5 Prep-C18 (100 Å); eluent: A (water + 0.1 % trifluoroacetic acid) and B (MeCN + 0.1 % trifluoroacetic acid); sample was run at 25 mL/min with a gradient of: 0-30 min: 100% A, 30-40 min 100% B, 40-60 min: 100 % A, 60-70 min: 100% A; detection: 235 nm) afforded benzoyl  $\beta$ -D-maltotrioside **10** (20.7 mg, 3 %) as a white solid,  $R_f$  0.1 (3:7 MeOH:DCM);  $t_R$  = 5.24 mins;  $\delta_H$  (400 MHz, D<sub>2</sub>O) 3.39 j(1H, m, H-5a), 3.54-3.98 (17H, m, H-2a, H-3a, H-4a, H-6a, H-6a', H-2b, H-3b, H-4b, H-5b, H-6b, H-6b', H-2c, H-3c, H-4c, H-5c, H-6c, H-6c'), 5.38 (1H, d,  $J_{1c,2c}$  4.0 Hz, H-1c), 5.40 (1H, d,  $J_{1b,2b}$  3.9 Hz, H-1b), 5.81 (1H, d,  $J_{1a,2a}$  8.2 Hz, H-1a), 7.55 (2H, d,  $J$  7.5 Hz, Ar-H), 7.71 (1H, d,  $J$  7.5 Hz, Ar-H), 8.10 (2H, d,  $J$  7.8 Hz, Ar-H);  $\delta_C$  (100 MHz, D<sub>2</sub>O) 60.3 (t, C-6c), 60.5 (t, C-6b), 69.3 (d, C-5a), 71.2 (d, C-5c), 71.5 (d, C-3b), 71.7 (d, C-3c), 71.9 (d, C-5b), 72.7 (d, C-2b), 72.9 (d, C-2c), 73.3 (d, C-2a), 75.5 (d, C-4a), 75.9 (d, C-4c), 76.4 (d, C-3a), 76.9 (d, C-4b), 94.4 (d, C-1a), 99.5 (d, C-1b), 99.8 (d, C-1c), 128.1, 128.8, 129.9, 134.6 (Ar-C), 166.9 (s,  $\underline{COC_6H_5}$ ); HRMS (ESI) Cald. for C<sub>25</sub>H<sub>35</sub>O<sub>17</sub><sup>-</sup> (M - H<sup>+</sup>) 607.1880. Found 607.1874.

## Spectra Data

### Benzoyl 2-Acetamido-2-deoxy-D-glucopyranoside **3**

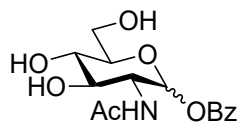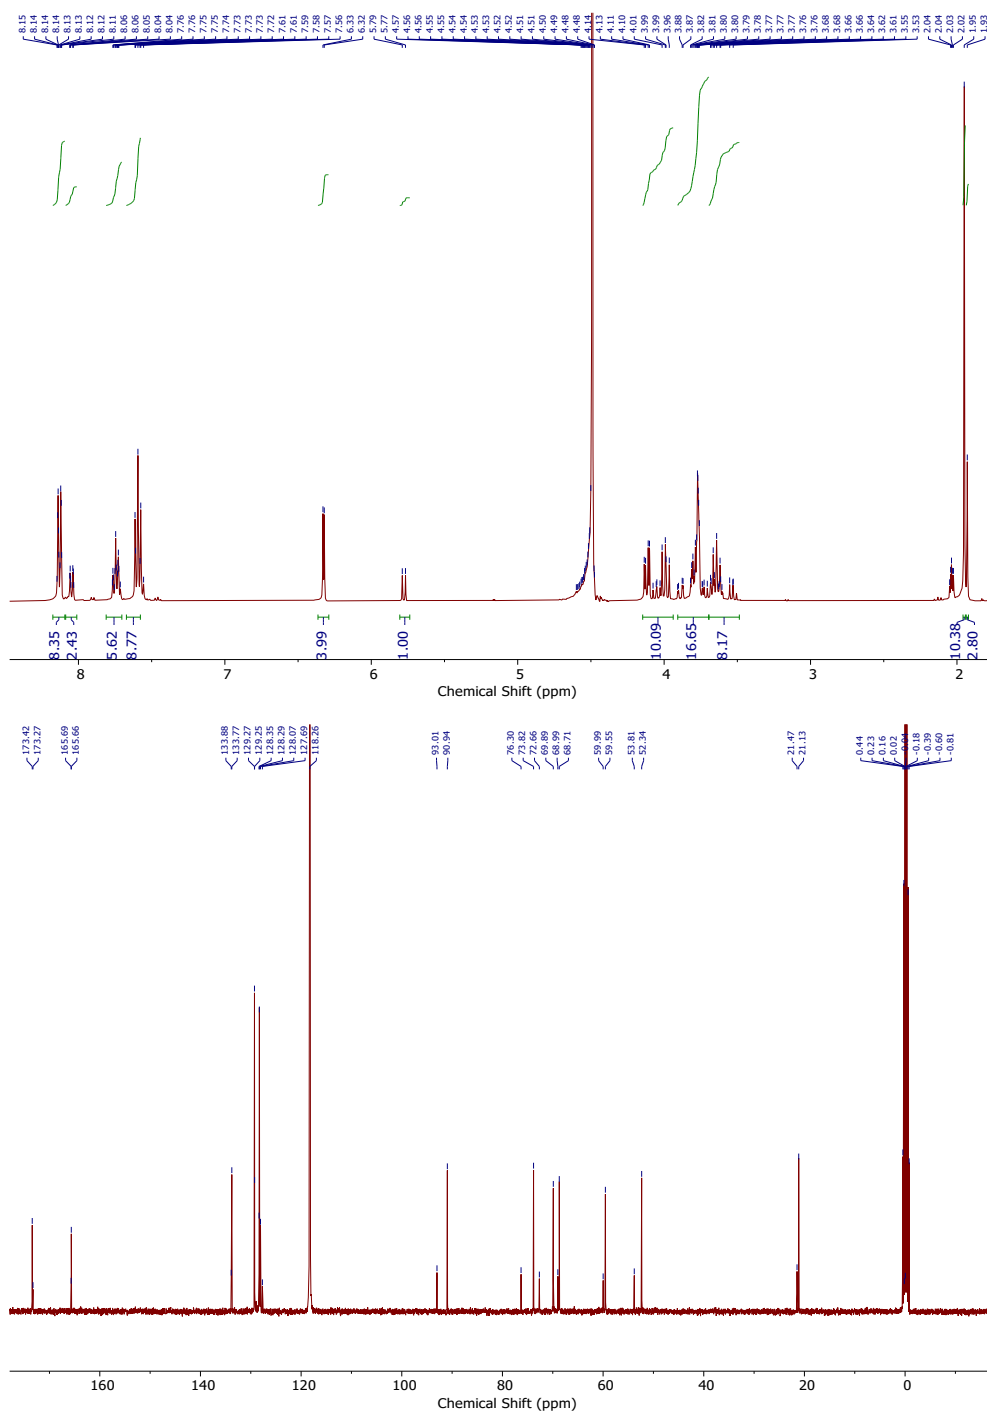

Benzoyl β-D-glucopyranoside **5**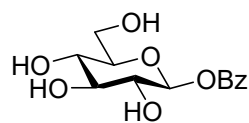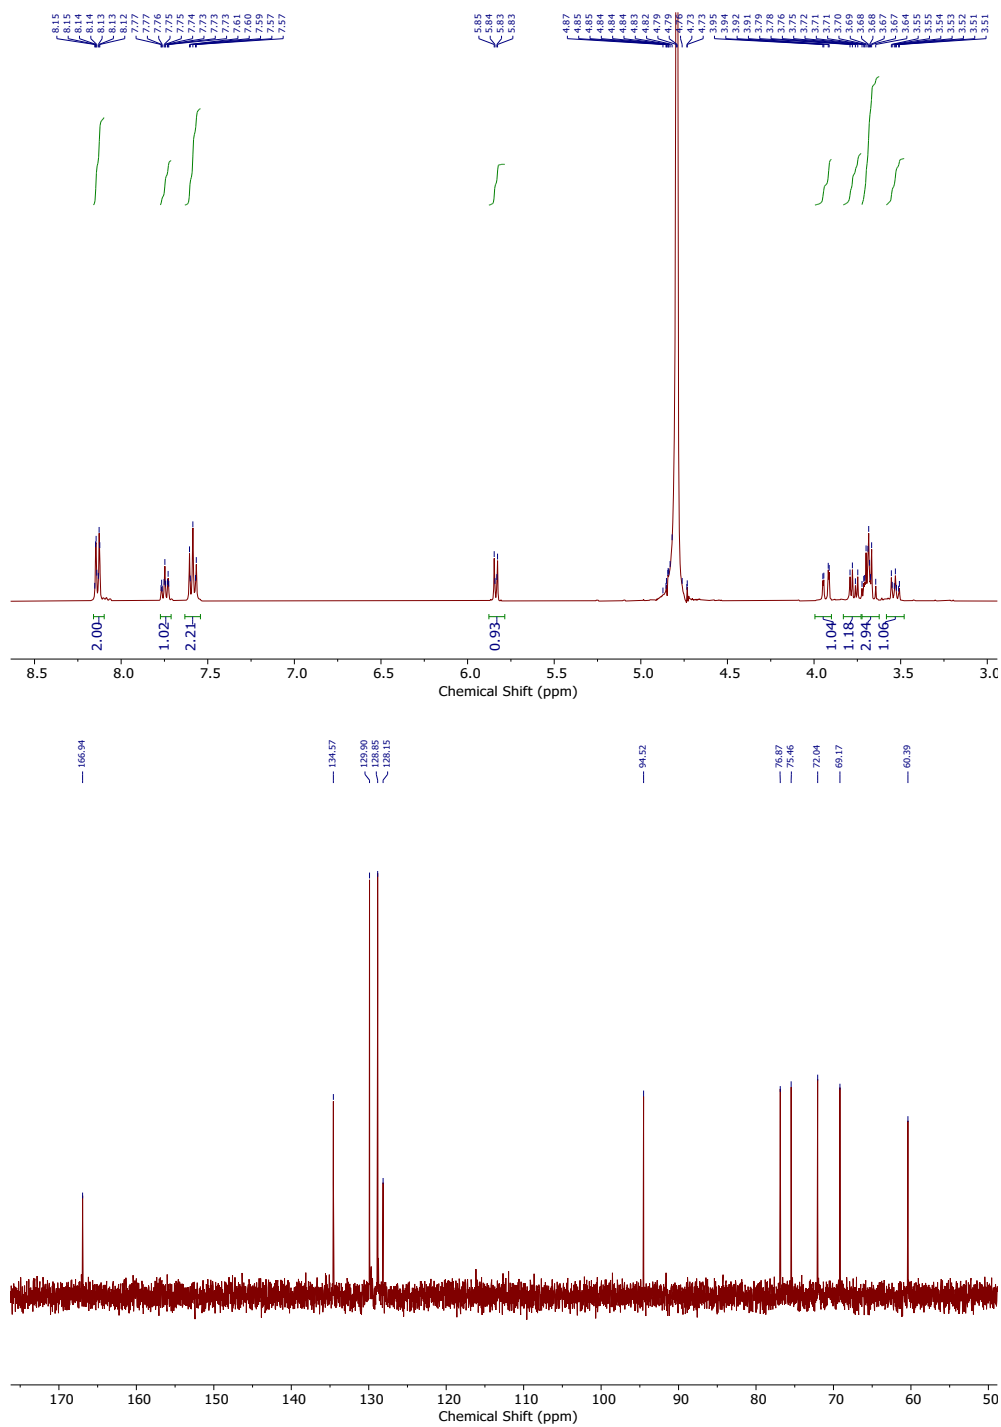

# Benzoyl $\alpha$ -D-mannopyranoside **7**

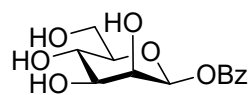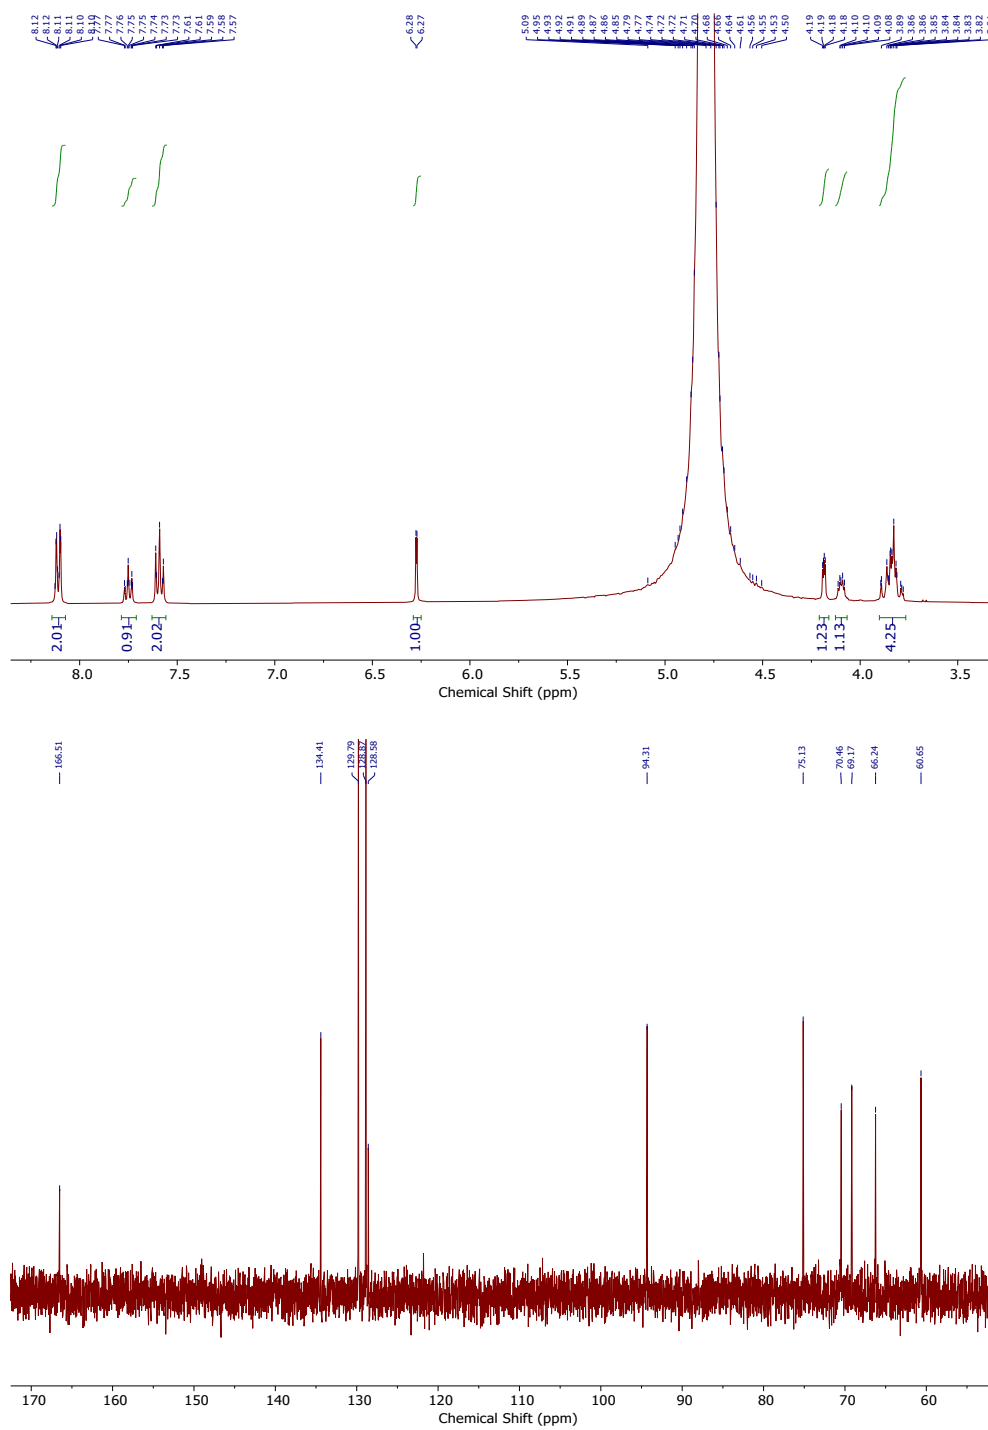

# Benzoyl β-D-lactoside **8**

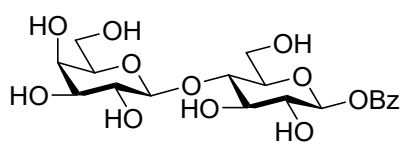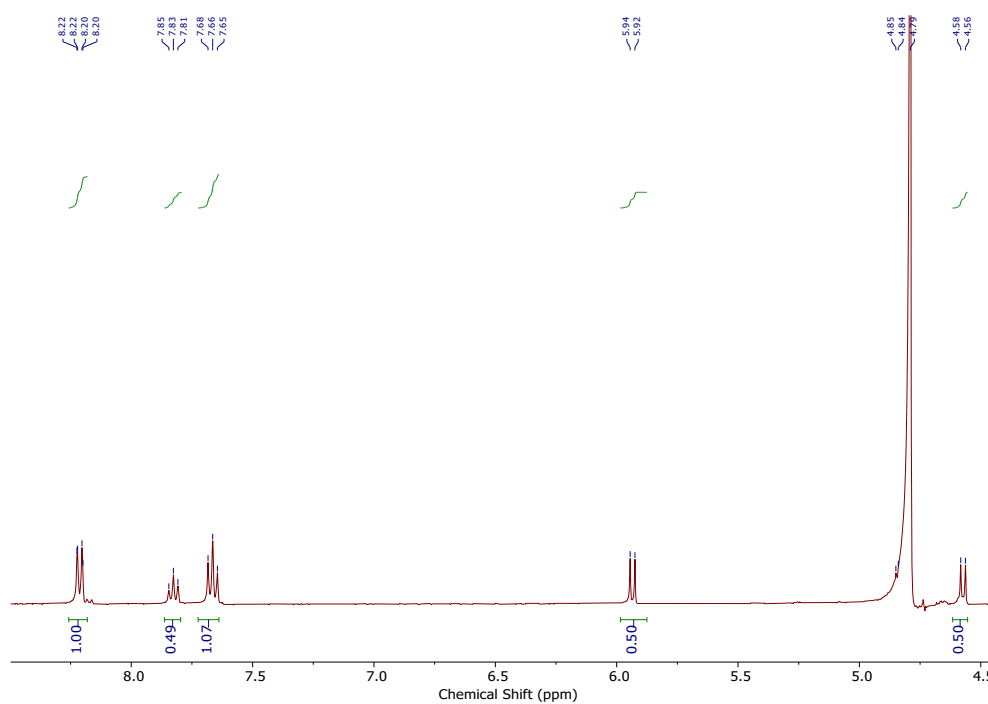

# Benzoyl β-D-maltoside **9**

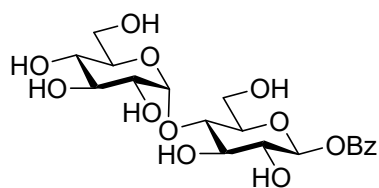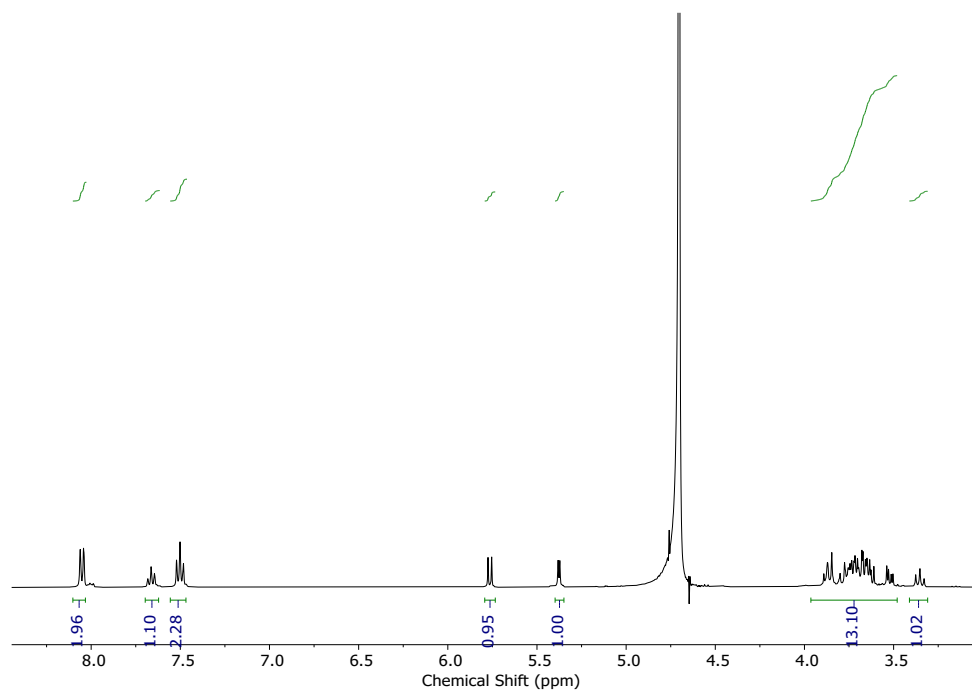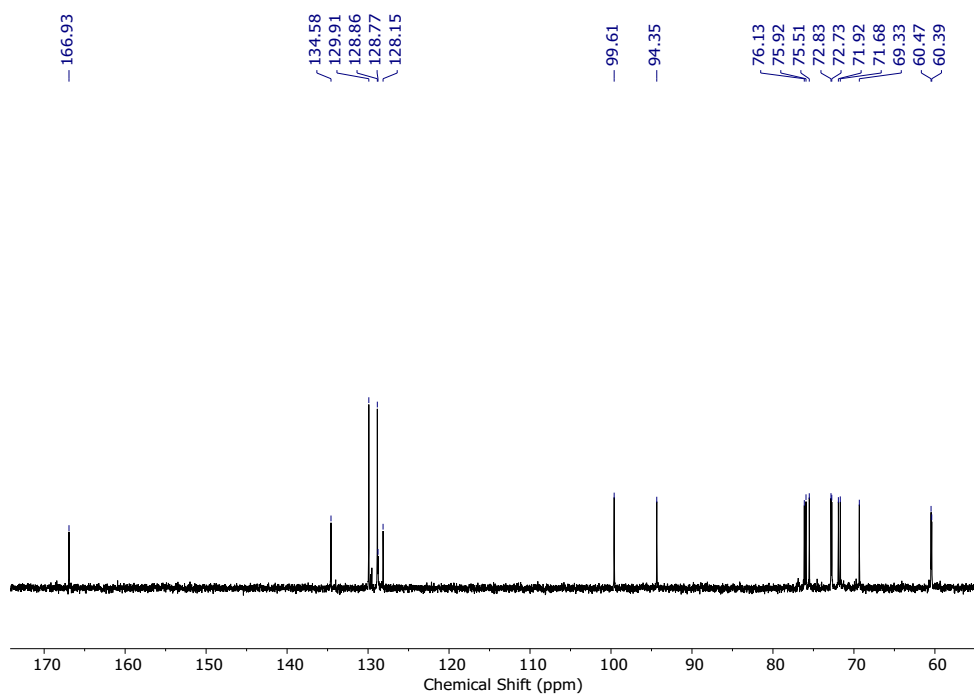

# Benzoyl $\beta$ -D-maltotrioside **10**

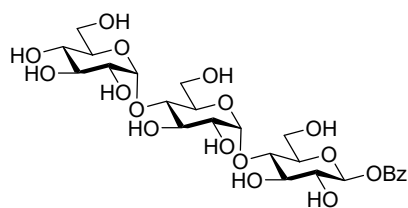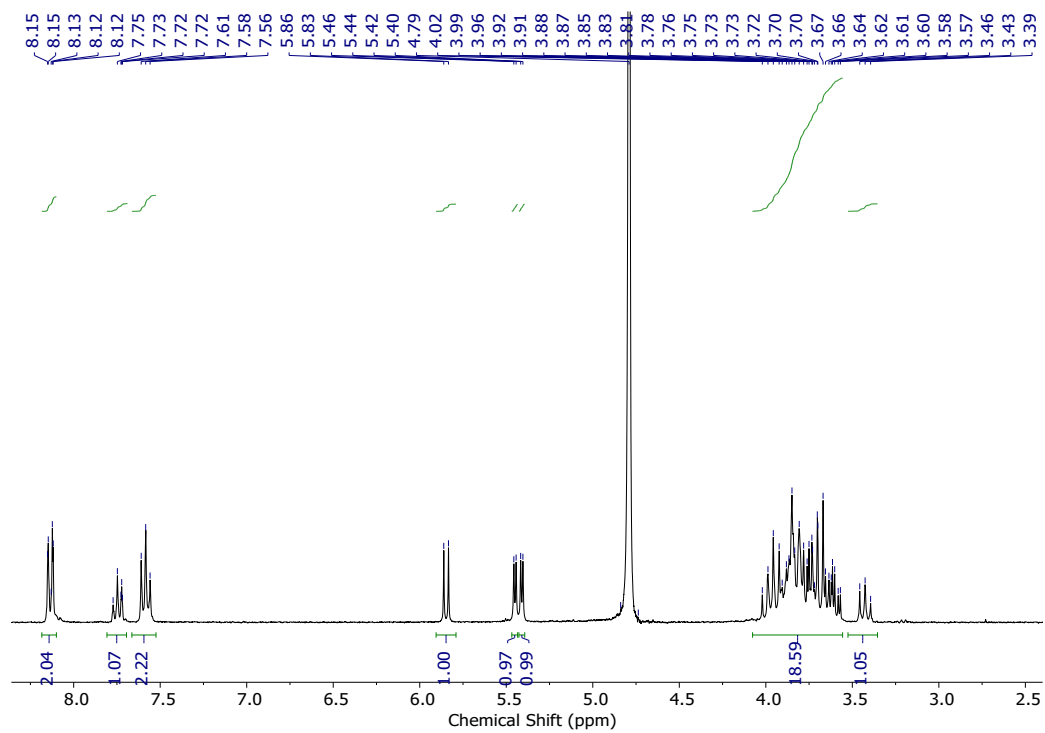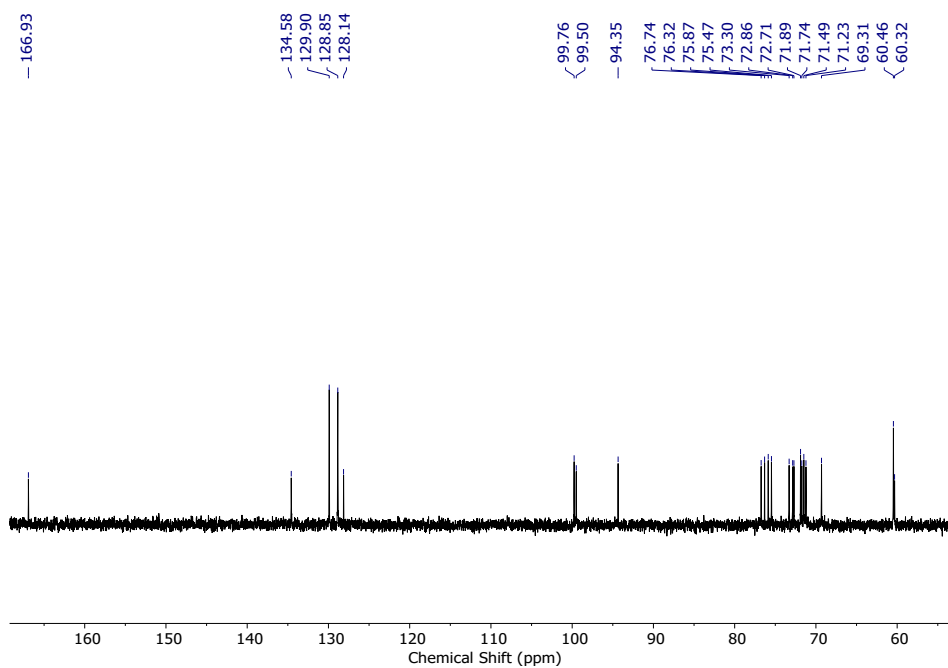

## References

1. Pillet, L.; Lim, D.; Almulhim, N.; Benitez-Mateos, A. I.; Paradisi, F., *Chem Commun.* **2022**, 58 (86), 12118-12121.
2. Bock, K.; Lundt, I.; Pedersen, C., *Tetrahedron Lett.* **1973**, 14 (13), 1037-1040.
3. Almulhim, N.; Moody, N. R.; Paradisi, F., *Appl Microbiol Biotechnol* **2020**, 104 (10), 4407-4415.
4. Wilkins, M. R.; Gasteiger, E.; Bairoch, A.; Sanchez, J. C.; Williams, K. L.; Appel, R. D.; Hochstrasser, D. F., *Methods Mol Biol* **1999**, 112, 531-52.
5. Lim, D.; Brimble, M. A.; Kowalczyk, R.; Watson, A. J.; Fairbanks, A. J., *Angew Chem Int Ed* **2014**, 53 (44), 11907-11.
6. Dey, K.; Jayaraman, N., *Chem Commun* **2022**, 58 (13), 2224-2227.
